# Supplementary material for: Synthesis of rigid and stable large-inner-diameter multiwalled carbon nanotubes
Source: Royal Society of Chemistry journal article supplement (doi:10.1039/c2ra01334g), 2012-01-01
Supplement: c2ra01334g.pdf [file c2ra01334g.pdf]

## Supporting Information

# Synthesis of Rigid and Stable Large-Inner-Diameter Multiwalled Carbon Nanotubes

Yulin Huang, Dionisios G. Vlachos\* & Jingguang G. Chen\*

*Catalysis Center for Energy Innovation, Center for Catalytic Science and Technology,*

*Department of Chemical Engineering, University of Delaware, Newark, DE 19716-3111, USA*

## 1. Syntheses of materials

**Synthesis of LID-MWCNTs:** Typically, 0.5 g cetyltrimethylammonium bromide (CTAB) was dissolved in 10.0 mL water and 0.6766 g ammonium metatungstate hydrate was dissolved in 230 mL water. The aqueous CTAB solution was added drop-wise into the ammonium metatungstate solution with vigorous stirring. The produced white solid  $[(\text{CTA})_6\text{H}_2\text{W}_{12}\text{O}_{40}]_n$  was collected by filtration, washed with copious water and ethanol, dried under vacuum at 353 K overnight.  $[(\text{CTA})_6\text{H}_2\text{W}_{12}\text{O}_{40}]_n$  was transferred into a quartz tube. The tube was purged with Ar several times and sealed with high vacuum (13.33 Pa) inside. The quartz tube with sample inside was heated to 1273 K at 1.0 K/min and kept at 1273 K for 2 hours before cooled down to room temperature naturally. Black powder inside the tube reactor was confirmed as large-inner-diameter multiwalled carbon nanotubes (LID-MWCTNs) by different analytic methods.

**Synthesis of surface-coated  $\text{WO}_3$  nanowires:** The quartz tube with  $[(\text{CTA})_6\text{H}_2\text{W}_{12}\text{O}_{40}]_n$  inside was sealed with high vacuum (13.33 Pa) inside, heated to 1273 K at 1.0 K/min and kept at 1273 K for 2 hours before cooled down to room temperature naturally. Black powder at the bottom of the tube reactor was confirmed as surface-coated  $\text{WO}_3$  nanowires.

**Synthesis of amorphous carbon/WC composite from WC nanoparticles and CTAB:** WC nanoparticles (50 – 100 nm in diameter) and CTAB with W/C ratio at 1/60, same as that for LID-MWCNTs synthesis described above, were mixed into a quartz tube reactor and sealed under high vacuum at 13.33 Pa. The reactor was heated to 1273 K at 1.0 K/min and kept at 1273 K for 2 hours before cooled down to room temperature naturally.

**Synthesis of graphene/WC composite from WO<sub>3</sub> nanoparticles and CTAB:** Here, LID-MWCTNs were heated to 573 K slowly at 0.5 K/min in air. After 2 hours at 573 K, WO<sub>3</sub> nanoparticles with diameter of 20 -30 nm were formed. WO<sub>3</sub> nanoparticles and CTAB with W/C ratio at 1/60, same as that for LID-MWCNTs synthesis described above, were mixed into a quartz tube reactor and sealed under high vacuum (13.33 Pa). The reactor was heated to 1273 K at 1.0 K/min and kept at 1273 K for 2 hours before cooled down to room temperature naturally.

## 2. Characterizations of materials

Large-angle X-ray diffraction (XRD) patterns were recorded on a Phillips Norelco powder diffractometer using Cu K radiation (40 kV, 40 mA) at the rate of 0.6° min<sup>-1</sup> over the range 2 $\theta$  = 20.0 – 80.0°. SEM images were measured using JSM-7400F field emission scanning electron microscope. JOEL JEM-2010F transmission electron microscope with a 200 kV acceleration voltage was used to collect TEM and HRTEM images.

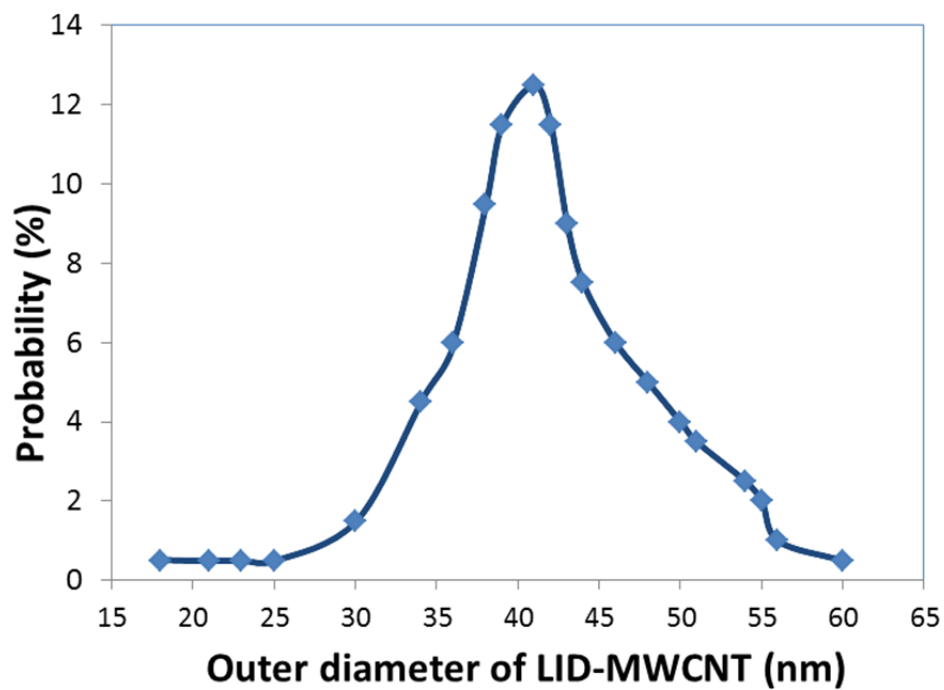

**Figure S1.** The distribution of outer diameters of LID-MWCNTs.

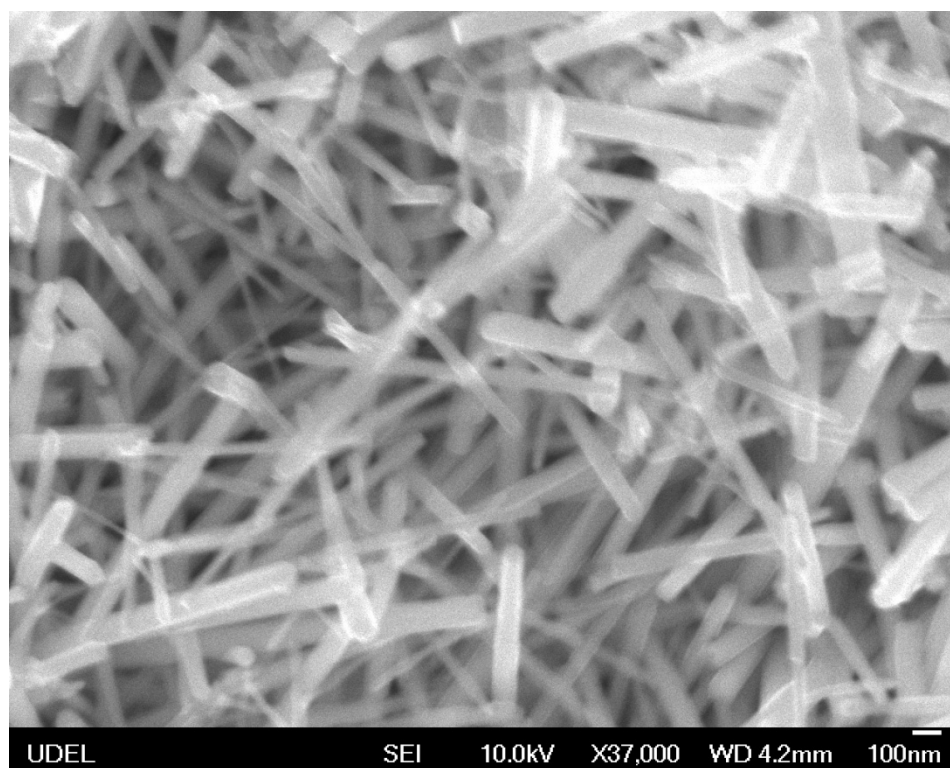

**Figure S2.** SEM images of LID-MWCNTs before the removal of WC nanoparticles.

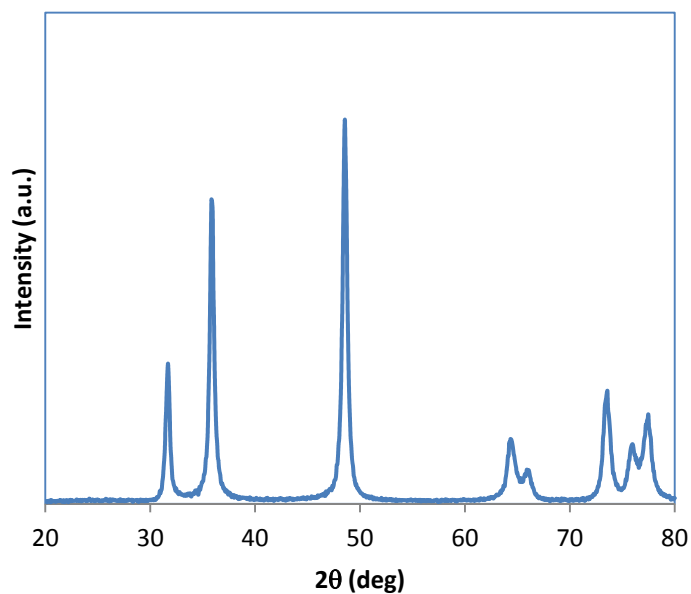

**Figure S3.** XRD of WC nanoparticles inside LID-MWCNTs.

(Figure S3 indicates a pure hexagonal WC phase inside LID-MWCNTs. The  $2\theta$  of 31.54, 34.84, 48.48, 64.16, 64.58, 73.28, 75.62 and 75.86° with  $d$  values of 0.2838, 0.2574, 0.1879, 0.1451, 0.1291, 0.1255, 0.1237 nm correspond to (001), (100), (101), (110), (002), (111), (200) and (102) planes of the pure hexagonal WC.)

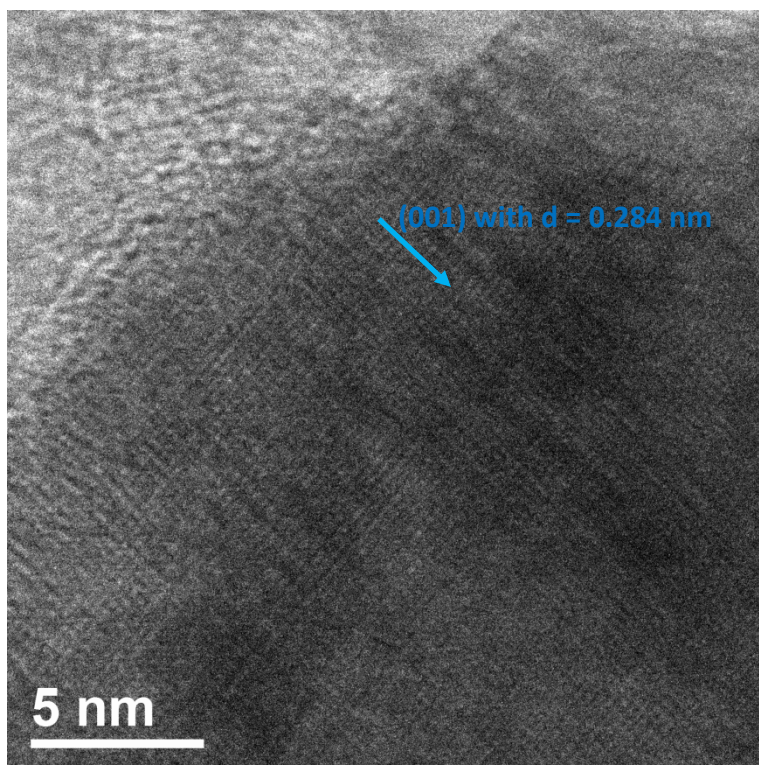

**Figure S4.** HRTEM of WC nanoparticle inside of LID-MWCNT.

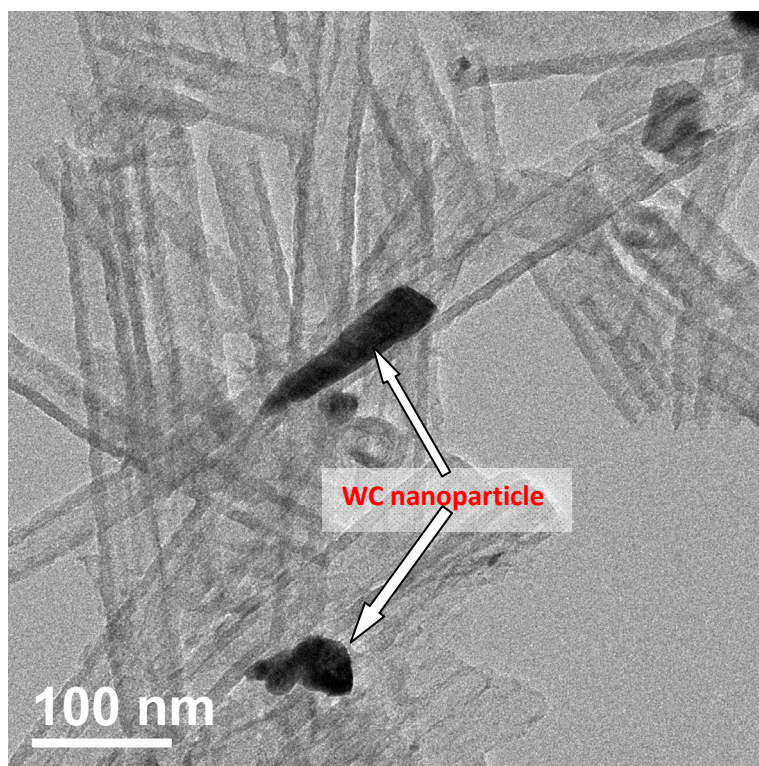

**Figure S5.** TEM images of LID-MWCNTs after partially removal of WC.



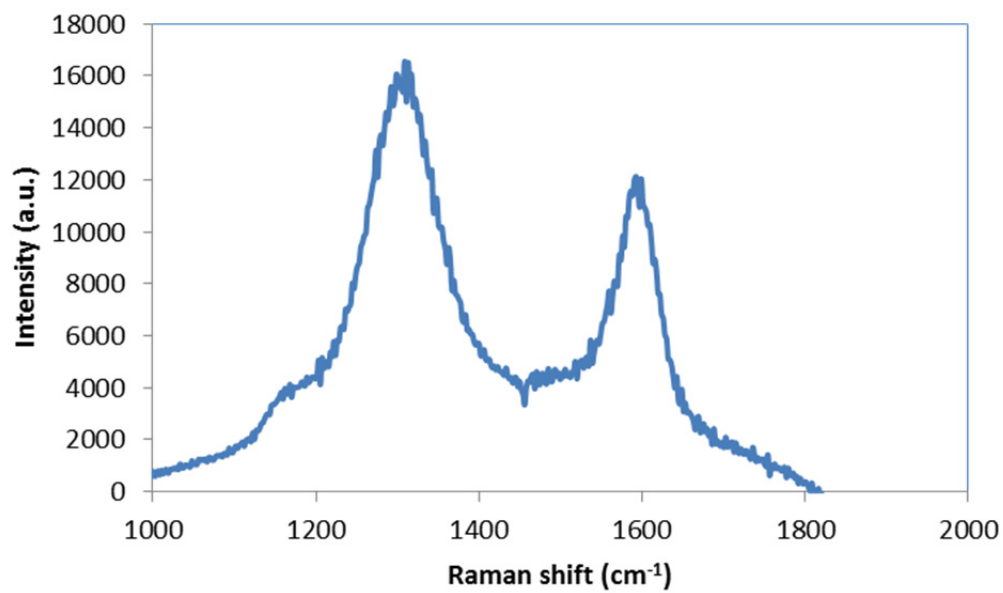

**Figure S6.** Raman spectrum of LID-WMCNTs.



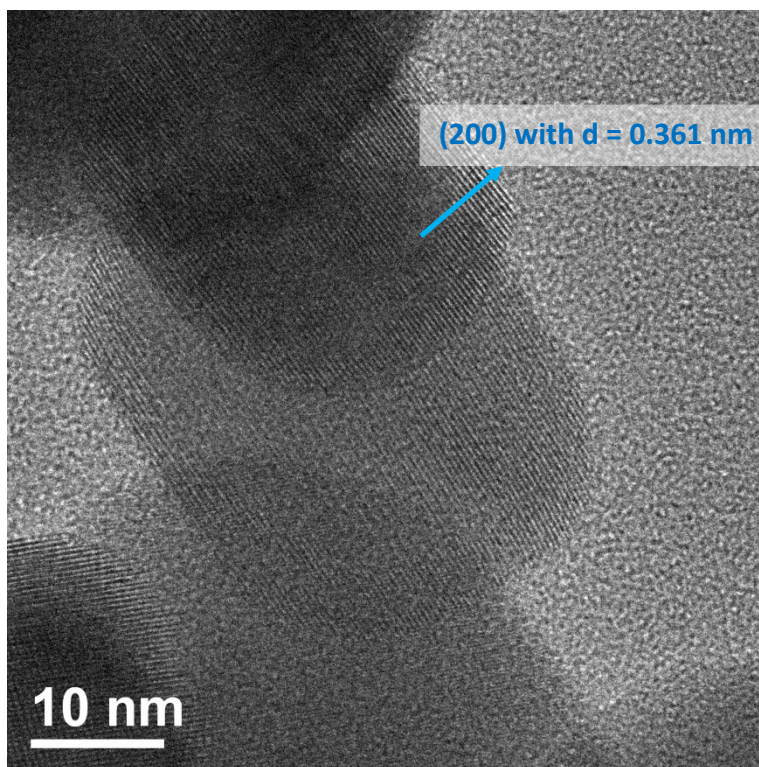

**Figure S7.** TEM images of WO<sub>3</sub> nanoparticles with diameter of 20 - 30 nm.

(The lattice structure of WO<sub>3</sub> can be clearly seen. The lattice fringes were about 0.361 nm, corresponding to the interplanar spacing of (200) planes of triclinic WO<sub>3</sub> (JCPDS card No. 01-083-0947).)

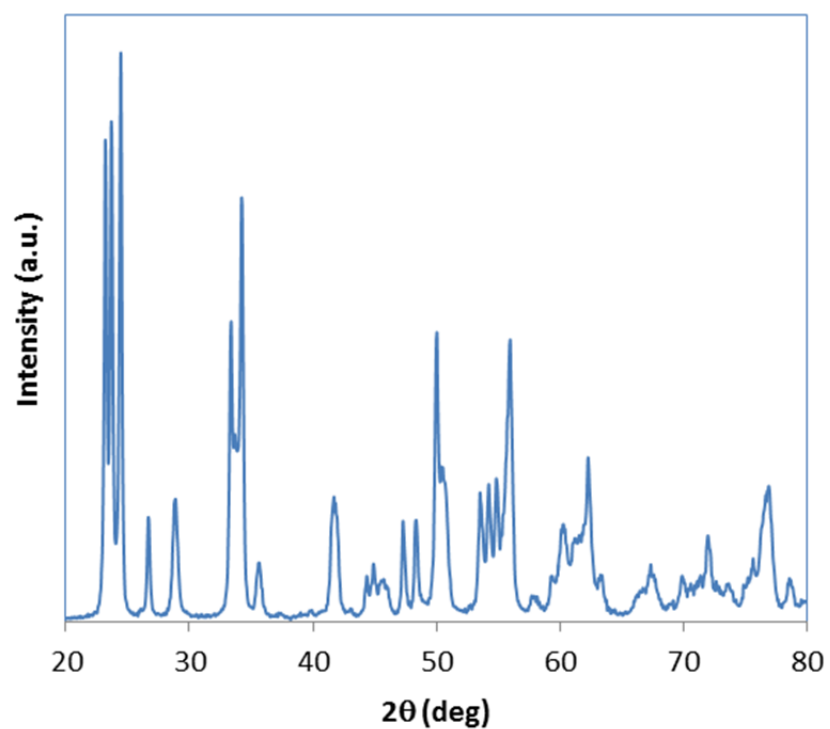

**Figure S8.** Large-angle X-ray diffraction of of  $\text{WO}_3$  nanoparticles with diameter of 20 - 30 nm.  
(This XRD pattern matches with the reported in JCPDS card No. 01-083-0947.)

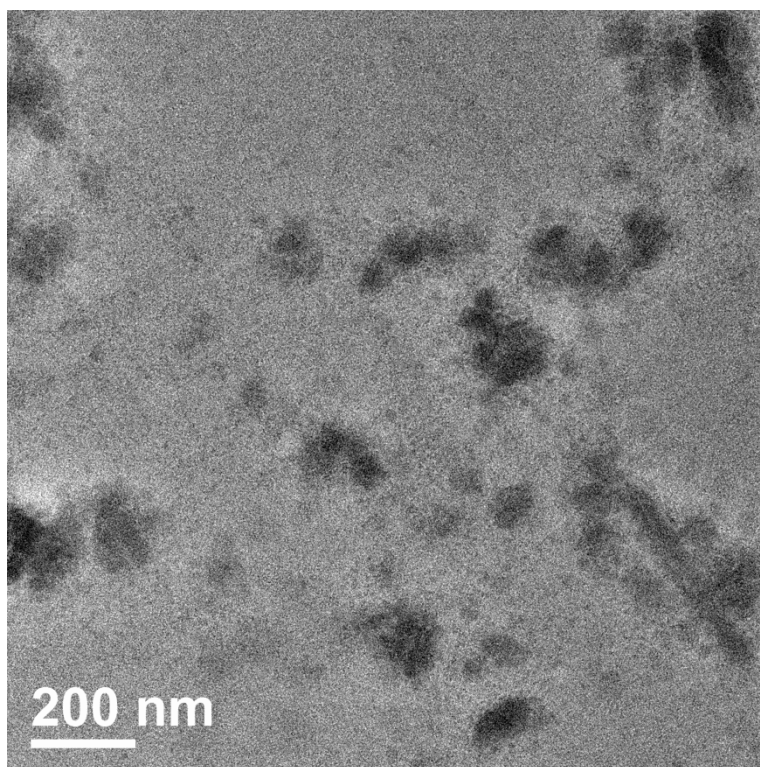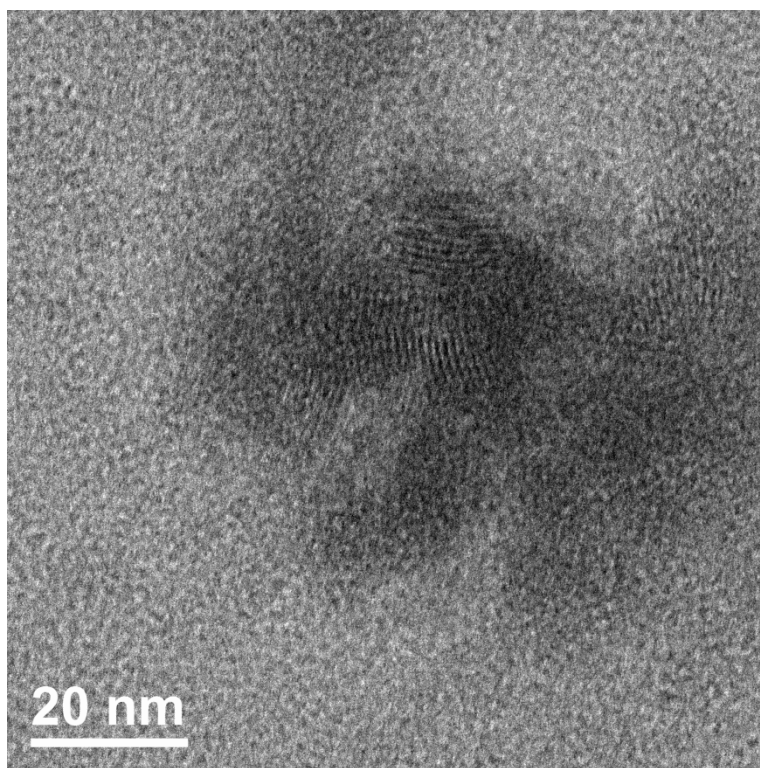

**Figure S9.** TEM images of CTA<sup>+</sup>/H<sub>2</sub>W<sub>12</sub>O<sub>40</sub><sup>6-</sup>.

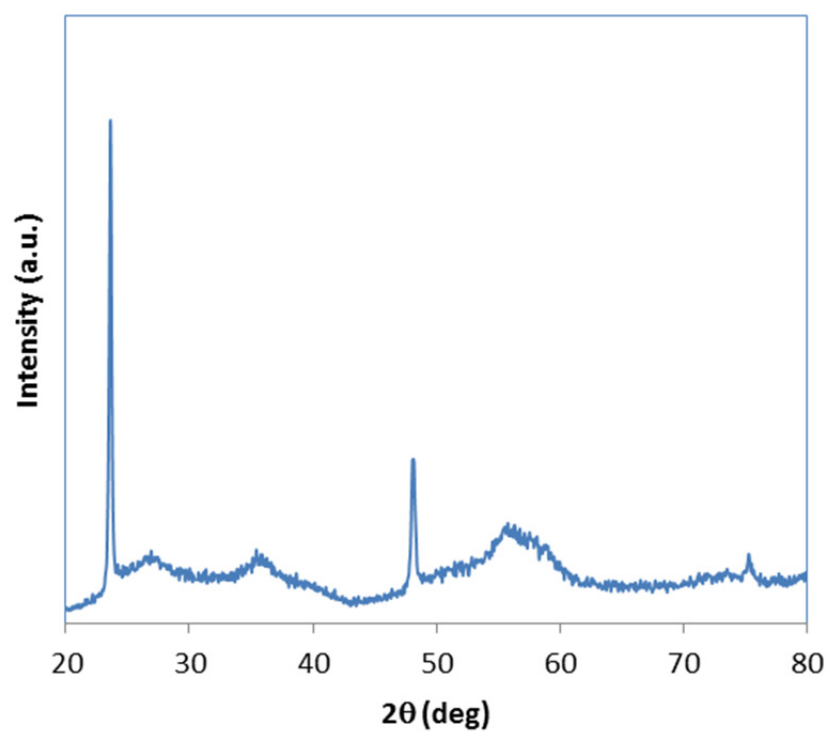

**Figure S10.** XRD of polymer-coated WO<sub>3</sub> nanowires.

(The  $2\theta$  of 23.6 and 55.22° correspond to (002) and (440) planes of WO<sub>3</sub>. The other peaks at 25.40, 31.40, 54.56 and 75.2° are broadened and could not be assigned to some specific peaks.)

**Table S1.** Elemental analysis of different materials.

|   | Reaction temp. (K) | H/C molar ratio | Sample composition                                                           |
|---|--------------------|-----------------|------------------------------------------------------------------------------|
| 1 | none               | 2.2             | $[(\text{CTA})_6\text{H}_2\text{W}_{12}\text{O}_{40}]_n$ (starting material) |
| 2 | 573                | 1.8             | Polymer-coated $\text{WO}_3$ nanowires                                       |
| 3 | 673                | 1.3             | Polymer-coated $\text{WO}_3$ nanowires                                       |
| 4 | 773                | 1.0             | Polymer-coated $\text{WO}_3$ nanowires                                       |
| 5 | 873                | 0.3             | Polymer/carbon-coated $\text{WO}_3$ nanowires                                |
| 6 | 973                | 0               | Carbon-coated $\text{WO}_3$ nanowires                                        |
| 4 | 1273               | 0               | WC/LID-MWCNTs                                                                |
